# Supplementary material for: Organ aging signatures in the plasma proteome track health and disease
Source: PubMed Central journal article supplement (PMC10700136; doi:10.1038/s41586-023-06802-1), 2023-12-06
Supplement: 41586_2023_6802_MOESM1_ESM.pdf [file 41586_2023_6802_MOESM1_ESM.pdf]

---

**Supplementary information**

---

**Organ aging signatures in the plasma proteome track health and disease**

---

In the format provided by the authors and unedited

## Organ aging signatures in the plasma proteome track health and disease

Hamilton Oh<sup>1,2,3,#</sup>, Jarod Rutledge<sup>2,3,4,#</sup>, Daniel Nachun<sup>5</sup>, Róbert Pálovics<sup>2,3,6</sup>, Olamide Abiose<sup>3,6</sup>, Patricia Moran-Losada<sup>2,3,6</sup>, Divya Channappa<sup>2,3,6</sup>, Deniz Yagmur Urey<sup>2,7</sup>, Kate Kim<sup>2,3,6</sup>, Yun Ju Sung<sup>8,9</sup>, Lihua Wang<sup>8,9</sup>, Jigyasha Timsina<sup>8,9</sup>, Dan Westem<sup>8,9,10</sup>, Menghan Liu<sup>8,9</sup>, Pat Kohlfeld<sup>8,9</sup>, John Budde<sup>8,9</sup>, Edward N. Wilson<sup>3,6</sup>, Yann Guen<sup>6</sup>, Taylor M. Maurer<sup>7</sup>, Michael Haney<sup>2,3,6</sup>, Andrew C. Yang<sup>11,12</sup>, Zihuai He<sup>6</sup>, Michael D. Greicius<sup>6</sup>, Katrin I. Andreasson<sup>3,6</sup>, Sanish Sathyan<sup>13</sup>, Erica F. Weiss<sup>14</sup>, Sofiya Milman<sup>13</sup>, Nir Barzilai<sup>13</sup>, Carlos Cruchaga<sup>8,9</sup>, Anthony Wagner<sup>3</sup>, Elizabeth Mormino<sup>6</sup>, Benoit Lehallier<sup>6</sup>, Victor W. Henderson<sup>3,6,15</sup>, Frank M. Longo<sup>3,6</sup>, Stephen B. Montgomery<sup>6,16</sup>, Tony Wyss-Coray<sup>2,3,6,\*</sup>

1 Graduate Program in Stem Cell and Regenerative Medicine, Stanford University, Stanford, California, USA.

2 The Phil and Penny Knight Initiative for Brain Resilience, Stanford University, Stanford, California, USA.

3 Wu Tsai Neurosciences Institute, Stanford University, Stanford, CA, USA.

4 Graduate Program in Genetics, Stanford University, Stanford, California, USA.

5 Department of Pathology, Stanford University School of Medicine, Stanford, California, USA.

6 Department of Neurology and Neurological Sciences, Stanford University School of Medicine, Stanford, California, USA.

7 Department of Bioengineering, Stanford University School of Engineering, Stanford, CA, USA

8 Department of Psychiatry, Washington University in St Louis, St Louis, Missouri, USA

9 NeuroGenomics and Informatics Center, Washington University School of Medicine, St. Louis, MO, USA

10 Division of Biology and Biomedical Sciences, Washington University School of Medicine, St. Louis, MO, USA

11 Department of Anatomy, University of California San Francisco, San Francisco, CA, USA.

12 Bakar Aging Research Institute, University of California San Francisco, San Francisco, CA, USA.

13 Departments of Medicine and Genetics, Institute for Aging Research, Albert Einstein College of Medicine, Bronx, New York, USA.

14 Department of Neurology, Montefiore Medical Center, Bronx, New York, USA.

15 Department of Epidemiology and Population Health, Stanford University, Stanford, CA, USA.

16 Department of Genetics, Stanford University School of Medicine, Stanford, California, USA.

# these authors contributed equally

\* correspondence to [twc@stanford.edu](mailto:twc@stanford.edu)

## Table of Contents

|                                                                           |     |
|---------------------------------------------------------------------------|-----|
| A. Identification of putative organ-derived plasma proteins.....          | 1   |
| B. Non-linear associations between organ age gaps and mortality risk..... | 1-2 |
| C. Relationships between blood biochemistry markers and organ aging.....  | 2-3 |
| D. Relationship between CognitionBrain age gap and brain volume.....      | 3-4 |
| E. Literature review of highly weighted brain aging proteins.....         | 4-5 |
| F. Complete study references.....                                         | 5-9 |

## 1 Supplementary Discussion

### 4 A. Identification of putative organ-derived plasma proteins

5 We used the Gene Tissue Expression Atlas (GTEx) human tissue bulk RNA-seq database<sup>16</sup> to  
6 identify organ-specific genes and plasma proteins. We determined organ-specificity based on a  
7 4-fold cutoff in bulk RNA-seq data for three main reasons:

- 8 1. Determining tissue specificity based on a 4-fold increase in RNA-seq expression  
9 (“tissue-enriched”) from GTEx and other databases is a well-accepted approach,  
10 established by the Human Protein Atlas (HPA) in multiple studies<sup>81–83</sup>. The HPA’s tissue-  
11 enriched gene sets are widely trusted and are provided in NCBI, GeneCards, and  
12 enrichment analysis tools such as gprofiler<sup>71</sup>. We used the same metric but with the  
13 updated, more deeply sequenced GTEx RNA-seq dataset and with a more generalizable  
14 framework for tissue->organ mapping (Supplementary Table 2).
- 15 2. We considered determining organ-specificity based on tissue protein levels from a  
16 human tissue proteomics atlas (Jiang et al)<sup>84</sup>; however, we opted not to because organ  
17 protein levels may be misleading in regard to determining the original organ source of  
18 the protein. Specifically, a protein may be present in an organ because it was trafficked  
19 there after being synthesized by another organ and secreted into the plasma. Albumin  
20 and complement proteins are not enriched at the protein level in the liver even though  
21 they are synthesized there, and there are proteins which are synthesized in the  
22 hypothalamus that are enriched in the pituitary because they are stored there before  
23 release<sup>84</sup>. Generally, discordance between protein and RNA levels are interpreted as a  
24 result of protein trafficking/export/secretion, while enrichment at the RNA level is  
25 recognized as the tissue of origin for protein synthesis<sup>81,82,84,85</sup>. It may also be true that  
26 proteins which are present at the protein level in an organ but are not synthesized there  
27 also contain important information about said organ. We believe this idea of cross-organ  
28 communication in aging is an exciting area for future study. For the current manuscript,  
29 our goal was to determine the putative organ source of plasma proteins to infer organ  
30 age.
- 31 3. RNA-seq data contains nearly full coverage of the genome, while proteomics data has  
32 much lower coverage. In Jiang et al, only 6320 proteins were detected in >50% of  
33 samples, and these are heavily biased towards abundant proteins, which are detectable  
34 by mass spectrometry. The percentage of these mappable to the SomaScan plasma  
35 proteomics assay is even lower. Determining organ-specificity based on RNA-seq data  
36 increased our coverage of the mappable organ-specific plasma proteome.

### 39 B. Non-linear associations between organ age gaps and mortality risk.

40 To better understand potential non-linear associations between age gaps and disease risk, we  
41 performed a binned age gap versus mortality risk analysis in the LonGenity cohort  
42 (Supplementary Figure 4). Specifically, we binned individuals into different age gap groups:

- 43 - Bin -2 (-2.5 < age gap < -1.5)
- 44 - Bin -1 (-1.5 < age gap < -0.5)
- 45 - Bin 0 (-0.5 < age gap < +0.5)
- 46 - Bin +1 (+0.5 < age gap < +1.5)
- 47 - Bin +2 (+1.5 < age gap < +2.5)
- 48 - Bin +3 (+2.5 < age gap < +3.5)

49 - Bin -3 and other more extreme bins were removed due to low sample size.

50

51 We then compared every non-zero group with the zero group (denoting the non-zero group as 1  
52 and the zero group as 0) for changes in mortality risk. We did this analysis for each of the aging  
53 models. We did not adjust for multiple comparisons because the assumptions were not met:  
54 each statistical test is done in a different subset of individuals, and tests for different bins in the  
55 same organ are generally correlated.

56

57 Interestingly, the association between the age gap and mortality risk was non-linear for some  
58 organs, such as the heart, brain, pancreas, kidney. The relationship with the heart age gap  
59 seems to be U-shaped where both high (+1, +2, +3) and extremely low heart age gaps (-2) are  
60 associated with increased mortality risk. The kidney age gap was also interesting in that it was  
61 not associated with mortality risk when looking at the whole age gap distribution (Fig. 2j), but the  
62 +3 age gap group was positively associated with mortality, suggesting the “extreme agers”  
63 framework may be more useful for certain organs and traits. Other organs, including the  
64 organismal, adipose, artery, and immune, show a more linear relationship with mortality risk.  
65 Whether these nonlinear dynamics also exist for other aging biomarkers, such as methylation  
66 clocks, is unknown. This analysis points to a need for additional studies on the relationship  
67 between extreme aging and disease risk.

68

69

### 70 **C. Relationships between blood biochemistry markers and organ aging.**

71 While a full analysis of all clinical biochemistry markers is challenging, there are a number of  
72 additional interesting relationships in the data.

73

74

75

76

77

78

79

80

81

82

83

84

85

86

87

88

89

90

91

92

93

94

95

96

97

98

- BUN: Kidney, adipose, brain, immune, and muscle age gaps are significantly positively associated with BUN, artery age gap is significantly negatively associated. The strongest association is with the kidney age gap. While BUN is not specific, it is often considered a marker of kidney function clinically.
- AST: Kidney, heart, and artery age gaps are positively significantly associated with AST, while brain is significantly negatively associated. AST variation within the normal range is difficult to interpret clinically. Abnormally high AST is often a sign of liver or heart disease, and moderately high AST is most often noted as a sign of elevated cardiovascular risk in middle aged and elderly populations.
- ALT: The brain, control, liver, intestine, kidney, organismal, and pancreas age gaps are significantly negatively associated with ALT, while the kidney age gap is significantly positively associated with ALT. PhenoAge gap is positive but not significant. As discussed in the text, this is yet another U-shaped aging biomarker. Low ALT in the elderly is associated with increased frailty and reduced survival and has been previously suggested as a biomarker of aging<sup>86</sup>. Abnormally high ALT can be a marker of acute liver damage, although it is also produced by other tissues and is not specific.
- Albumin: The immune, heart, liver, organismal, control, and PhenoAge gaps are significantly negatively associated with albumin levels. The strongest association is with the liver age gap. Albumin is produced by the liver, although it is not detected by the SomaScan assay so it is not a protein in the liver aging model. Clinically, lower albumin could be considered as a sign of worse health, and it can be low in a number of liver, kidney, and digestive diseases as well as in malnutrition/undernutrition.
- Plasma glucose is significantly positively associated with PhenoAge age gap and kidney age gap, while intestine and liver age gap are significantly negatively associated. The strongest association is with PhenoAge, which is unsurprising since plasma glucose is the highest weighted input biomarker in the PhenoAge model. Both kidney and intestine

99 age gap are positively associated with diabetes incidence but have differential  
100 associations with plasma glucose. This further supports the hypothesis that different  
101 organ models could be measuring different aspects of aging, in this case metabolic  
102 aging. Insulin resistance, glucose response, and glucose levels are all known to degrade  
103 with age, but insulin levels and glucose response have been noted to change more  
104 dramatically than fasting blood glucose level<sup>87</sup>.

105 There are many biomarkers of health which have a nonlinear relationship to aging  
106 outcomes, and in the elderly many relationships between biomarkers and health/mortality/frailty  
107 reverse direction compared to young and middle-aged adults. The distribution and mean age of  
108 the population that an aging model is trained on will thus impact associations with traits. This is  
109 not frequently discussed or accounted for in models of molecular aging.

110 Such a case is illustrated by diastolic blood pressure, where the strongest association  
111 was with heart aging (adjusted Pearson  $r=-0.18$ ,  $q=2.62e-10$ ). Nine organ age gaps (adipose,  
112 brain, control, heart, intestine, kidney, liver, muscle, organismal, pancreas) were significantly  
113 associated with decreases in diastolic blood pressure, while the opposite association was seen  
114 with the PhenoAge age gap (Supplementary Fig. 5a, Supplementary Table 14). Diastolic blood  
115 pressure was one of many traits with a U-shaped relationship to aging outcomes  
116 (Supplementary Fig. 5b). While high blood pressure in young and middle-aged adults is  
117 indicative of cardiometabolic dysfunction, in the elderly low blood pressure is common and more  
118 strongly associated with mortality and frailty<sup>88-90</sup>, though high blood pressure is also  
119 detrimental<sup>91</sup>. The differences between PhenoAge and the organ age models could be due to  
120 differences in the age distribution of the underlying training cohorts for the models. Our models  
121 were trained in the KADRC, which has a greater proportion of elderly individuals, while  
122 PhenoAge was trained in NHANES, which has a greater proportion of young individuals.

123 This kind of U-shaped relationship with age and aging outcomes is quite common and is  
124 also seen with BMI<sup>92</sup>. Prospective studies in older adults have shown that while obesity slightly  
125 increases mortality and cardiovascular disease risk, the highest risk groups are those with a  
126 BMI under 23. Interestingly, the intestine and pancreas age gaps show a negative association  
127 with BMI and obesity but a positive association with mortality risk, while the kidney age gap  
128 shows a positive association with BMI, suggesting that the full picture of organ health in aging  
129 and disease may be more complex than currently understood.

#### 130 131 132 **D. Relationship between CognitionBrain age gap and brain volume.**

133 To further examine the relationship between the CognitionBrain age model and brain  
134 aging, we tested associations between CognitionBrain age gap and changes in brain volume. We  
135 used plasma-matched brain MRI data from 469 individuals in the Stanford-ADRC and SAMS  
136 cohorts to assess the relationship between the CognitionBrain age gap and brain region-specific  
137 volumes (Extended Data Fig. 7c, Supplementary Table 22). 39 out of 65 (60%) associations were  
138 significant after multiple hypothesis correction. The most significant associations were negative  
139 associations with the superior frontal cortex (adjusted  $r=-0.20$ ,  $q=8.49e-5$ ), hippocampus  
140 (adjusted  $r=-0.21$ ,  $q=1.36e-4$ ), and total cortex (adjusted  $r=-0.20$ ,  $q=1.39e-4$ ), whereby individuals  
141 with smaller brain region volumes appeared older based on their CognitionBrain age gaps. We  
142 also found a negative association with the AD signature region (adjusted  $r=-0.16$ ,  $q=3.61e-3$ ), a  
143 composite measure of the parahippocampal gyrus, entorhinal cortex, inferior parietal lobes,  
144 hippocampus, and precuneus<sup>93</sup>.

145 We then compared our plasma proteomics-based brain age to two MRI brain aging clocks.  
146 Based on its established publication record, we started with the BARACUS model<sup>78</sup>, a linear  
147 support vector machine based aging clock trained on brain MRI-based volumetric data from 1,166  
148 cognitively normal individuals aged 20-80. However, when assessing predicted versus  
149 chronological age correlation, we noticed an odd technical artifact: the predicted age had a ceiling

150 near 75, even for individuals with chronological age above 90. Looking more closely at the original  
 151 publication, we found the same issue of an upper ceiling, and also a lower ceiling, to predicted  
 152 age. This leads us to believe that the BARACUS algorithm cannot accommodate all ages in our  
 153 cohort.

154 Due to this technical limitation of BARACUS, we also assessed brainageR<sup>14</sup>, a Gaussian  
 155 Processes based aging clock trained on brain MRI-based volumetric data from n=3,377  
 156 cognitively healthy individuals aged 18-92, and which has shown better performance than  
 157 BARACUS in other studies<sup>94</sup>. The CognitionBrain age gap was positively correlated with the  
 158 brainageR age gap ( $r=0.16$ ,  $p=7.51e-4$ ) (Extended Data Fig. 6h), but not as strongly as the  
 159 correlation between CognitionBrain age gap and individual brain volumes (ie. hippocampus:  
 160 adjusted  $r=-0.21$ ,  $q=1.36e-4$ ). This is likely due to the fact that BARACUS and brainageR do not  
 161 take into account total intracranial volume and thus capture more noise.

162  
 163

164 **E. Literature review of highly weighted brain aging proteins.**

| Protein     | Reference                                                                                | Title                                                                                                                                                                     | Organism |
|-------------|------------------------------------------------------------------------------------------|---------------------------------------------------------------------------------------------------------------------------------------------------------------------------|----------|
| CPLX1       | Yu, et. al., <i>JAMA Psychiatry</i> (2020)                                               | Cortical Proteins Associated with Cognitive Resilience in Community-Dwelling Older Persons                                                                                | Human    |
| CPLX1       | Glynn, et. al., <i>Human Molecular Genetics</i> (2005)                                   | Profound ataxia in complexin I knockout mice masks a complex phenotype that includes exploratory and habituation deficits                                                 | Mouse    |
| CPLX1,CPLX2 | Tannenberg, et. al., <i>Neurochemistry International</i> (2006)                          | Selective loss of synaptic proteins in Alzheimer's disease: Evidence for an increased severity with APOE $\epsilon 4$                                                     | Human    |
| CPLX2       | Begemann, et al. <i>Arch. Gen. Psychiatry</i> (2010)                                     | Modification of Cognitive Performance in Schizophrenia by Complexin 2 Gene Polymorphisms                                                                                  | Human    |
| CPLX2       | Glynn, et. al., <i>Human Molecular Genetics</i> (2003)                                   | Complexin II is essential for normal neurological function in mice                                                                                                        | Mouse    |
| CPLX2       | Li, et. al., <i>Oxidative Medicine and Cellular Longevity</i> (2020)                     | Proteomic Profile of Mouse Brain Aging Contributions to Mitochondrial Dysfunction, DNA Oxidative Damage, Loss of Neurotrophic Factor, and Synaptic and Ribosomal Proteins | Mouse    |
| FGF4        | Konijnenberg, et. al., <i>Alzheimer's Research &amp; Therapy</i> (2020)                  | APOE $\epsilon 4$ genotype-dependent cerebrospinal fluid proteomic signatures in Alzheimer's disease                                                                      | Human    |
| FGF4        | Kosaka, et. al., <i>Federation of American Societies for Experimental Biology</i> (2006) | FGF-4 regulates neural progenitor cell proliferation and neuronal differentiation                                                                                         | Mouse    |
| LANCL1      | Drummond, et. al., <i>Brain</i> (2020)                                                   | Phosphorylated tau interactome in the human Alzheimer's disease brain                                                                                                     | Human    |
| LANCL1      | Huang, Chen, and Peng, et. al., <i>Developmental Cell</i> (2014)                         | Developmental and Activity-Dependent Expression of LanCL1 Confers Antioxidant Activity Required for Neuronal Survival                                                     | Mouse    |
| LANCL1      | Tan and Chen, et. al., <i>Cell Death &amp; Differentiation</i> (2020)                    | LanCL1 promotes motor neuron survival and extends the lifespan of amyotrophic lateral sclerosis mice                                                                      | Mouse    |
| NPTXR       | Begcevic, et. al., <i>F1000Research</i> (2018)                                           | Neuronal pentraxin receptor-1 is a new cerebrospinal fluid biomarker of Alzheimer's disease progression                                                                   | Human    |
| NPTXR       | Pelkey, et. al. <i>Neuron</i> (2015)                                                     | Pentraxins Coordinate Excitatory Synapse Maturation and Circuit Integration of Parvalbumin Interneurons                                                                   | Mouse    |
| NRXN3       | Hishimoto, et. al., <i>Alzheimer's Research &amp; Therapy</i> (2019)                     | Neurexin 3 transmembrane and soluble isoform expression and splicing haplotype are associated with neuron inflammasome and Alzheimer's disease                            | Human    |
| NRXN3       | Zheng, et. al., <i>Medicine</i> (2018)                                                   | Low expression of aging-related NRXN3 is associated with Alzheimer disease                                                                                                | Human    |
| NRXN3       | Martinez-Mir, et. al., <i>J Alz Disease</i> (2013)                                       | Genetic study of neurexin and neuroligin genes in Alzheimer's disease                                                                                                     | Human    |
| NRXN3       | Aoto, et. al. <i>Nature Neuroscience</i> (2015)                                          | Distinct circuit-dependent functions of presynaptic neurexin-3 at GABAergic and glutamatergic synapses                                                                    | Mouse    |

| Protein | Reference                                                          | Title                                                                                                                                                                                       | Organism |
|---------|--------------------------------------------------------------------|---------------------------------------------------------------------------------------------------------------------------------------------------------------------------------------------|----------|
| OLFM1   | Nakaya, et. al., <i>Experimental Neurology</i> (2013)              | Deletion in the N-terminal half of olfactomedin 1 modifies its interaction with synaptic proteins and causes brain dystrophy and abnormal behavior in mice                                  | Mouse    |
| OLFM1   | Nakaya, et. al., <i>Journal of Biological Chemistry</i> (2012)     | Olfactomedin 1 Interacts with the Nogo A Receptor Complex to Regulate Axon Growth                                                                                                           | Mouse    |
| STMN2   | Theunissen, et. al., <i>Frontiers in Aging Neuroscience</i> (2021) | Novel STMN2 Variant Linked to Amyotrophic Lateral Sclerosis Risk and Clinical Phenotype                                                                                                     | Human    |
| STMN2   | Krus, et. al., <i>Cell Reports</i> (2022)                          | Loss of Stathmin-2, a hallmark of TDP-43-associated ALS, causes motor neuropathy                                                                                                            | Human    |
| STMN2   | San Juan and Nash, et. al., <i>Neuron</i> (2022)                   | Loss of mouse <i>Stmn2</i> function causes motor neuropathy                                                                                                                                 | Mouse    |
| TNR     | Wagner, et. al., <i>Genetics in Medicine</i> (2020)                | Loss of TNR causes a nonprogressive neurodevelopmental disorder with spasticity and transient opisthotonus                                                                                  | Human    |
| TNR     | Dankovich, et. al., <i>Nature Communications</i> (2021)            | Extracellular matrix remodeling through endocytosis and resurfacing of Tenascin-R                                                                                                           | Mouse    |
| TNR     | Bauch and Faissner, <i>Cells</i> (2022)                            | The Extracellular Matrix Proteins Tenascin-C and Tenascin-R Retard Oligodendrocyte Precursor Maturation and Myelin Regeneration in a Cuprizone-Induced Long-Term Demyelination Animal Model | Mouse    |

165

166

167

## 168 F. Complete study references

169

- 170 1. Schaum, N. *et al.* Ageing hallmarks exhibit organ-specific temporal signatures. *Nature* **583**,  
171 596–602 (2020).
- 172 2. Almanzar, N. *et al.* A single-cell transcriptomic atlas characterizes ageing tissues in the  
173 mouse. *Nature* **583**, 590–595 (2020).
- 174 3. Pálovics, R. *et al.* Molecular hallmarks of heterochronic parabiosis at single-cell resolution.  
175 *Nature* **603**, 309–314 (2022).
- 176 4. Zahn, J. M. *et al.* AGEMAP: A Gene Expression Database for Aging in Mice. *PLOS Genet.* **3**,  
177 e201 (2007).
- 178 5. Janelidze, S. *et al.* Plasma P-tau181 in Alzheimer’s disease: relationship to other biomarkers,  
179 differential diagnosis, neuropathology and longitudinal progression to Alzheimer’s dementia.  
180 *Nat. Med.* **26**, 379–386 (2020).
- 181 6. Hajat, C. & Stein, E. The global burden of multiple chronic conditions: A narrative review.  
182 *Prev. Med. Rep.* **12**, 284–293 (2018).
- 183 7. Kaeberlein Matt, Rabinovitch Peter S., & Martin George M. Healthy aging: The ultimate  
184 preventative medicine. *Science* **350**, 1191–1193 (2015).
- 185 8. Conboy, I. M. *et al.* Rejuvenation of aged progenitor cells by exposure to a young systemic  
186 environment. *Nature* **433**, 760–764 (2005).
- 187 9. Rutledge, J., Oh, H. & Wyss-Coray, T. Measuring biological age using omics data. *Nat. Rev.*  
188 *Genet.* 1–13 (2022) doi:10.1038/s41576-022-00511-7.
- 189 10. Putin, E. *et al.* Deep biomarkers of human aging: Application of deep neural networks to  
190 biomarker development. *Aging* **8**, 1021–1030 (2016).
- 191 11. Belsky, D. W. *et al.* Quantification of biological aging in young adults. *Proc. Natl. Acad.*  
192 *Sci.* **112**, E4104–E4110 (2015).
- 193 12. Levine, M. E. *et al.* An epigenetic biomarker of aging for lifespan and healthspan. *Aging*  
194 **10**, 573–591 (2018).
- 195 13. Tian, Y. E. *et al.* Heterogeneous aging across multiple organ systems and prediction of  
196 chronic disease and mortality. *Nat. Med.* **29**, 1221–1231 (2023).
- 197 14. Cole, J. H. *et al.* Brain age predicts mortality. *Mol. Psychiatry* **23**, 1385–1392 (2018).



- 198 15. Glorioso, C., Oh, S., Douillard, G. G. & Sibille, E. Brain Molecular Aging, Promotion of  
199 Neurological Disease and Modulation by Sirtuin5 Longevity Gene Polymorphism. *Neurobiol.*  
200 *Dis.* **41**, 279–290 (2011).
- 201 16. Consortium, T. Gt. The GTEx Consortium atlas of genetic regulatory effects across  
202 human tissues. *Science* **369**, 1318–1330 (2020).
- 203 17. Uhlén Mathias *et al.* Tissue-based map of the human proteome. *Science* **347**, 1260419  
204 (2015).
- 205 18. Hannum, G. *et al.* Genome-wide Methylation Profiles Reveal Quantitative Views of  
206 Human Aging Rates. *Mol. Cell* **49**, 359–367 (2013).
- 207 19. Horvath, S. DNA methylation age of human tissues and cell types. *Genome Biol.* **14**,  
208 3156 (2013).
- 209 20. Tanaka, T. *et al.* Plasma proteomic signature of age in healthy humans. *Aging Cell* **17**,  
210 e12799 (2018).
- 211 21. Lehallier, B. *et al.* Undulating changes in human plasma proteome profiles across the  
212 lifespan. *Nat. Med.* **25**, 1843–1850 (2019).
- 213 22. Sparks, M. A., Crowley, S. D., Gurley, S. B., Mirotsov, M. & Coffman, T. M. Classical  
214 Renin-Angiotensin System in Kidney Physiology. in *Comprehensive Physiology* 1201–1228  
215 (John Wiley & Sons, Ltd, 2014). doi:10.1002/cphy.c130040.
- 216 23. Buchanan, S., Combet, E., Stenvinkel, P. & Shiels, P. G. Klotho, Aging, and the Failing  
217 Kidney. *Front. Endocrinol.* **11**, (2020).
- 218 24. Gudbjartsson, D. F. *et al.* Association of Variants at UMOD with Chronic Kidney Disease  
219 and Kidney Stones—Role of Age and Comorbid Diseases. *PLOS Genet.* **6**, e1001039  
220 (2010).
- 221 25. Devuyst, O. & Pattaro, C. The *UMOD* Locus: Insights into the Pathogenesis  
222 and Prognosis of Kidney Disease. *J. Am. Soc. Nephrol.* **29**, 713 (2018).
- 223 26. Shrivastava, A., Haase, T., Zeller, T. & Schulte, C. Biomarkers for Heart Failure  
224 Prognosis: Proteins, Genetic Scores and Non-coding RNAs. *Front. Cardiovasc. Med.* **7**,  
225 (2020).
- 226 27. Ho, J. E. *et al.* Protein Biomarkers of Cardiovascular Disease and Mortality in the  
227 Community. *J. Am. Heart Assoc.* **7**, e008108 (2018).
- 228 28. Saberi, S. *et al.* Mavacamten Favorably Impacts Cardiac Structure in Obstructive  
229 Hypertrophic Cardiomyopathy. *Circulation* **143**, 606–608 (2021).
- 230 29. McCrory, C. *et al.* GrimAge Outperforms Other Epigenetic Clocks in the Prediction of  
231 Age-Related Clinical Phenotypes and All-Cause Mortality. *J. Gerontol. Ser. A* **76**, 741–749  
232 (2021).
- 233 30. Bellenguez, C. *et al.* New insights into the genetic etiology of Alzheimer’s disease and  
234 related dementias. *Nat. Genet.* **54**, 412–436 (2022).
- 235 31. Yu, L. *et al.* Cortical Proteins Associated With Cognitive Resilience in Community-  
236 Dwelling Older Persons. *JAMA Psychiatry* **77**, 1172–1180 (2020).
- 237 32. Begemann, M. *et al.* Modification of Cognitive Performance in Schizophrenia by  
238 Complex 2 Gene Polymorphisms. *Arch. Gen. Psychiatry* **67**, 879–888 (2010).
- 239 33. Hishimoto, A. *et al.* Neurexin 3 transmembrane and soluble isoform expression and  
240 splicing haplotype are associated with neuron inflammasome and Alzheimer’s disease.  
241 *Alzheimers Res. Ther.* **11**, 28 (2019).
- 242 34. Klim, J. R. *et al.* ALS-implicated protein TDP-43 sustains levels of STMN2, a mediator of  
243 motor neuron growth and repair. *Nat. Neurosci.* **22**, 167–179 (2019).
- 244 35. Nakaya, N., Sultana, A., Lee, H.-S. & Tomarev, S. I. Olfactomedin 1 Interacts with the  
245 Nogo A Receptor Complex to Regulate Axon Growth\*. *J. Biol. Chem.* **287**, 37171–37184  
246 (2012).

- 247 36. Yin, G. N., Lee, H. W., Cho, J.-Y. & Suk, K. Neuronal pentraxin receptor in cerebrospinal  
248 fluid as a potential biomarker for neurodegenerative diseases. *Brain Res.* **1265**, 158–170  
249 (2009).
- 250 37. Bader, J. M. *et al.* Proteome profiling in cerebrospinal fluid reveals novel biomarkers of  
251 Alzheimer's disease. *Mol. Syst. Biol.* **16**, e9356 (2020).
- 252 38. Tan, H. *et al.* LanCL1 promotes motor neuron survival and extends the lifespan of  
253 amyotrophic lateral sclerosis mice. *Cell Death Differ.* **27**, 1369–1382 (2020).
- 254 39. Johnson, E. C. B. *et al.* Large-scale deep multi-layer analysis of Alzheimer's disease  
255 brain reveals strong proteomic disease-related changes not observed at the RNA level. *Nat.*  
256 *Neurosci.* **25**, 213–225 (2022).
- 257 40. Tang, W., Huang, Q., Wang, Y., Wang, Z.-Y. & Yao, Y.-Y. Assessment of CSF A $\beta$ 42 as  
258 an aid to discriminating Alzheimer's disease from other dementias and mild cognitive  
259 impairment: A meta-analysis of 50 studies. *J. Neurol. Sci.* **345**, 26–36 (2014).
- 260 41. THE TABULA SAPIENS CONSORTIUM. The Tabula Sapiens: A multiple-organ, single-  
261 cell transcriptomic atlas of humans. *Science* **376**, eabl4896 (2022).
- 262 42. Yang, A. C. *et al.* A human brain vascular atlas reveals diverse mediators of Alzheimer's  
263 risk. *Nature* **603**, 885–892 (2022).
- 264 43. Sengillo, J. D. *et al.* Deficiency in Mural Vascular Cells Coincides with Blood–Brain  
265 Barrier Disruption in Alzheimer's Disease. *Brain Pathol.* **23**, 303–310 (2013).
- 266 44. Nikolakopoulou, A. M. *et al.* Pericyte loss leads to circulatory failure and pleiotrophin  
267 depletion causing neuron loss. *Nat. Neurosci.* **22**, 1089–1098 (2019).
- 268 45. Callegari, A., Coons, M. L., Ricks, J. L., Rosenfeld, M. E. & Scatena, M. Increased  
269 Calcification in Osteoprotegerin-Deficient Smooth Muscle Cells: Dependence on Receptor  
270 Activator of NF- $\kappa$ B Ligand and Interleukin 6. *J. Vasc. Res.* **51**, 118–131 (2014).
- 271 46. Köhler, S. *et al.* The Human Phenotype Ontology in 2021. *Nucleic Acids Res.* **49**,  
272 D1207–D1217 (2021).
- 273 47. Qureshi, A. R. *et al.* Increased circulating sclerostin levels in end-stage renal disease  
274 predict biopsy-verified vascular medial calcification and coronary artery calcification. *Kidney*  
275 *Int.* **88**, 1356–1364 (2015).
- 276 48. Touw, W. A. *et al.* Association of Circulating Wnt Antagonists With Severe Abdominal  
277 Aortic Calcification in Elderly Women. *J. Endocr. Soc.* **1**, 26–38 (2017).
- 278 49. Lu, A. T. *et al.* DNA methylation GrimAge strongly predicts lifespan and healthspan.  
279 *Aging* **11**, 303–327 (2019).
- 280 50. Ganz, P. *et al.* Development and Validation of a Protein-Based Risk Score for  
281 Cardiovascular Outcomes Among Patients With Stable Coronary Heart Disease. *JAMA* **315**,  
282 2532–2541 (2016).
- 283 51. Williams, S. A. *et al.* Plasma protein patterns as comprehensive indicators of health. *Nat.*  
284 *Med.* **25**, 1851–1857 (2019).
- 285 52. Gubbi, S. *et al.* Effect of Exceptional Parental Longevity and Lifestyle Factors on  
286 Prevalence of Cardiovascular Disease in Offspring. *Am. J. Cardiol.* **120**, 2170–2175 (2017).
- 287 53. Sathyan, S. *et al.* Plasma proteomic profile of age, health span, and all-cause mortality  
288 in older adults. *Aging Cell* **19**, e13250 (2020).
- 289 54. Wilson, E. N. *et al.* Performance of a fully-automated Lumipulse plasma phospho-tau181  
290 assay for Alzheimer's disease. *Alzheimers Res. Ther.* **14**, 172 (2022).
- 291 55. Berg, L. *et al.* Clinicopathologic Studies in Cognitively Healthy Aging and Alzheimer  
292 Disease: Relation of Histologic Markers to Dementia Severity, Age, Sex, and Apolipoprotein  
293 E Genotype. *Arch. Neurol.* **55**, 326–335 (1998).
- 294 56. Morris, J. C. The Clinical Dementia Rating (CDR): Current version and scoring rules.  
295 *Neurology* **43**, 2412-a (1993).
- 296 57. Gold, L. *et al.* Aptamer-Based Multiplexed Proteomic Technology for Biomarker  
297 Discovery. *PLOS ONE* **5**, e15004 (2010).

- 298 58. SomaLogic. SOMAscan® v4 Data Standardization and File Specification Technical  
299 Note.
- 300 59. SomaLogic. SomaScan® v4 Data Standardization. (2020).
- 301 60. SomaLogic. Technical Specification: Adaptive Normalization Using Maximum Likelihood.
- 302 61. Candia, J., Daya, G. N., Tanaka, T., Ferrucci, L. & Walker, K. A. Assessment of  
303 variability in the plasma 7k SomaScan proteomics assay. *Sci. Rep.* **12**, 17147 (2022).
- 304 62. Katz, D. H. *et al.* Proteomic profiling platforms head to head: Leveraging genetics and  
305 clinical traits to compare aptamer- and antibody-based methods. *Sci. Adv.* **8**, eabm5164  
306 (2022).
- 307 63. SomaSignal Tests - Products and Services. *SomaLogic*  
308 <https://somalogic.com/somasignal-tests-for-research-use/>.
- 309 64. Love, M. I., Huber, W. & Anders, S. Moderated estimation of fold change and dispersion  
310 for RNA-seq data with DESeq2. *Genome Biol.* **15**, 550 (2014).
- 311 65. Pedregosa, F. *et al.* Scikit-learn: Machine Learning in Python. *J. Mach. Learn. Res.* **12**,  
312 2825–2830 (2011).
- 313 66. Seabold, S. & Perktold, J. Statsmodels: Econometric and Statistical Modeling with  
314 Python. in *Proceedings of the 9th Python in Science Conference* (eds. Walt, S. van der &  
315 Millman, J.) 92–96 (2010). doi:10.25080/Majora-92bf1922-011.
- 316 67. Levine, M. E. *et al.* An epigenetic biomarker of aging for lifespan and healthspan. *Aging*  
317 **10**, 573–591 (2018).
- 318 68. Viechtbauer, W. Conducting Meta-Analyses in R with the metafor Package. *J. Stat.*  
319 *Softw.* **36**, 1–48 (2010).
- 320 69. Davidson-Pilon, Cameron. (2022). lifelines, survival analysis in Python (v0.27.0).  
321 Zenodo. <https://doi.org/10.5281/zenodo.6359609>.
- 322 70. Breiman, L. Random Forests. *Mach. Learn.* **45**, 5–32 (2001).
- 323 71. Raudvere, U. *et al.* g:Profiler: a web server for functional enrichment analysis and  
324 conversions of gene lists (2019 update). *Nucleic Acids Res.* **47**, W191–W198 (2019).
- 325 72. Szklarczyk, D. *et al.* The STRING database in 2021: customizable protein–protein  
326 networks, and functional characterization of user-uploaded gene/measurement sets. *Nucleic*  
327 *Acids Res.* **49**, D605–D612 (2021).
- 328 73. Litviňuková, M. *et al.* Cells of the adult human heart. *Nature* **588**, 466–472 (2020).
- 329 74. Stewart Benjamin J. *et al.* Spatiotemporal immune zonation of the human kidney.  
330 *Science* **365**, 1461–1466 (2019).
- 331 75. Michael S. Haney *et al.* APOE4/4 is linked to damaging lipid droplets in Alzheimer’s  
332 microglia. *bioRxiv* 2023.07.21.549930 (2023) doi:10.1101/2023.07.21.549930.
- 333 76. Johnson, E. C. B. *et al.* Large-scale deep multi-layer analysis of Alzheimer’s disease  
334 brain reveals strong proteomic disease-related changes not observed at the RNA level. *Nat.*  
335 *Neurosci.* **25**, 213–225 (2022).
- 336 77. Fischl, B. FreeSurfer. *NeuroImage* **62**, 774–781 (2012).
- 337 78. Liem, F. *et al.* Predicting brain-age from multimodal imaging data captures cognitive  
338 impairment. *NeuroImage* **148**, 179–188 (2017).
- 339 79. Poplin, R. *et al.* Scaling accurate genetic variant discovery to tens of thousands of  
340 samples. 201178 Preprint at <https://doi.org/10.1101/201178> (2018).
- 341 80. Chang, C. C. *et al.* Second-generation PLINK: rising to the challenge of larger and richer  
342 datasets. *GigaScience* **4**, s13742-015-0047–8 (2015).
- 343 81. Uhlén, M. *et al.* Tissue-based map of the human proteome. *Science* **347**, (2015).
- 344 82. Uhlén, M. *et al.* The human secretome. *Sci. Signal.* **12**, (2019).
- 345 83. Uhlen, M. *et al.* A genome-wide transcriptomic analysis of protein-coding genes in  
346 human blood cells. *Science* **366**, (2019).
- 347 84. Jiang, L. *et al.* A Quantitative Proteome Map of the Human Body. *Cell* **183**, 269-283.e19  
348 (2020).

- 349 85. Liu, Y., Beyer, A. & Aebersold, R. On the Dependency of Cellular Protein Levels on  
350 mRNA Abundance. *Cell* **165**, 535–550 (2016).
- 351 86. Le Couteur, D. G. *et al.* The Association of Alanine Transaminase With Aging, Frailty,  
352 and Mortality. *J. Gerontol. A. Biol. Sci. Med. Sci.* **65A**, 712–717 (2010).
- 353 87. Bryhni, B., Arnesen, E. & Jenssen, T. G. Associations of age with serum insulin,  
354 proinsulin and the proinsulin-to-insulin ratio: a cross-sectional study. *BMC Endocr. Disord.*  
355 **10**, 21 (2010).
- 356 88. Protogerou, A. D. *et al.* Diastolic Blood Pressure and Mortality in the Elderly With  
357 Cardiovascular Disease. *Hypertension* **50**, 172–180 (2007).
- 358 89. Taylor, J. O. *et al.* Blood Pressure and Mortality Risk in the Elderly. *Am. J. Epidemiol.*  
359 **134**, 489–501 (1991).
- 360 90. Boshuizen, H. C., Izaks, G. J., Buuren, S. van & Ligthart, G. J. Blood pressure and  
361 mortality in elderly people aged 85 and older: community based study. *BMJ* **316**, 1780–1784  
362 (1998).
- 363 91. Glynn, R. J. *et al.* Evidence for a positive linear relation between blood pressure and  
364 mortality in elderly people. *The Lancet* **345**, 825–829 (1995).
- 365 92. Ng, T. P. *et al.* Age-dependent relationships between body mass index and mortality:  
366 Singapore longitudinal ageing study. *PLOS ONE* **12**, e0180818 (2017).
- 367 93. Walker, K. A. *et al.* Large-scale plasma proteomic analysis identifies proteins and  
368 pathways associated with dementia risk. *Nat. Aging* **1**, 473–489 (2021).
- 369 94. Clausen, A. N. *et al.* Assessment of brain age in posttraumatic stress disorder: Findings  
370 from the ENIGMA PTSD and brain age working groups. *Brain Behav.* **12**, e2413 (2022).
- 371
- 372
